# Supplementary material
Source: publisher figshare collection journal article supplement (https://sage.figshare.com/ndownloader/files/20105564)
Supplement: Supplementary file [file 20105564]

Reviewer 2 v.1

Comments to the Author

This is a well written and comprehensive review of the literature regarding the challenges in using a variety of inhalation devices and considerations for personalizing therapy. The paper is written mainly from a European perspective. Tables 3 and 4 are especially helpful to compare the characteristics of various inhalers and the common errors encountered in clinical practice. Clinicians are likely to benefit from the information in this article.

The authors stress the importance of the effects of environmental conditions on storage and shelf-life of various inhalers. This useful information may be new for many readers.

Inclusion of pictures of various inhalers would enhance the review. Providing links to websites with the correct technique of use would also be helpful.
